# Supplementary material for: Climatic, topographic, and groundwater controls on runoff response to precipitation: evidence from a large-sample data set
Source: Copernicus journal article supplement (doi:10.5194/hess-29-5121-2025), 2025-10-13
Supplement: Supplementary file 1 [file hess-29-5121-2025-supplement.pdf]

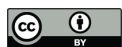

*Supplement of*

## **Climatic, topographic, and groundwater controls on runoff response to precipitation: evidence from a large-sample data set**

**Zahra Eslami et al.**

*Correspondence to:* James W. Kirchner (kirchner@ethz.ch)

The copyright of individual parts of the supplement might differ from the article licence.

## Supplementary information S1:

This supplementary information file contains supplementary figures S1 through S3.

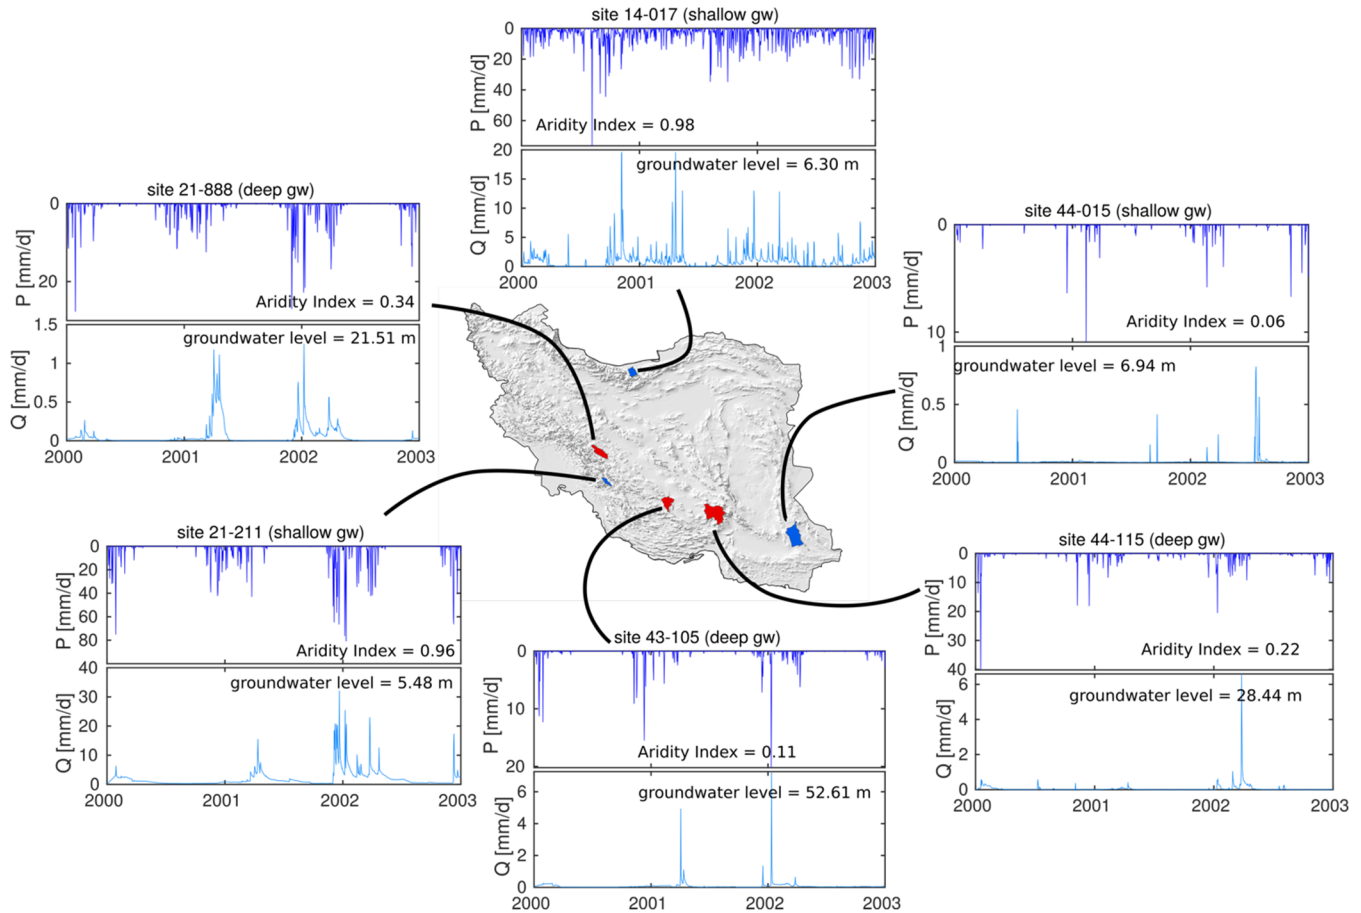

**Figure S1.** Time series of precipitation and stream discharge for the timespan 2000-2003, for 3 catchments with shallow groundwater (in blue on map) and 3 catchments with deep groundwater (in red on map). This figure is identical to Figure 2 in the main text, except it shows smaller timespans so that the runoff dynamics are clearer. Note that axis scales vary so that each catchment's behavior is visible.

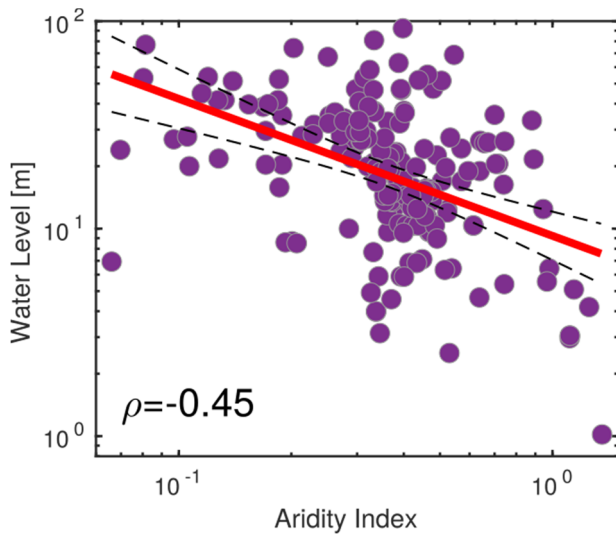

**Figure S2: Relationship between Aridity Index and groundwater levels.** Groundwater levels in arid climates (smaller Aridity Index) are typically deeper compared to groundwater levels in humid regions (larger Aridity Index).

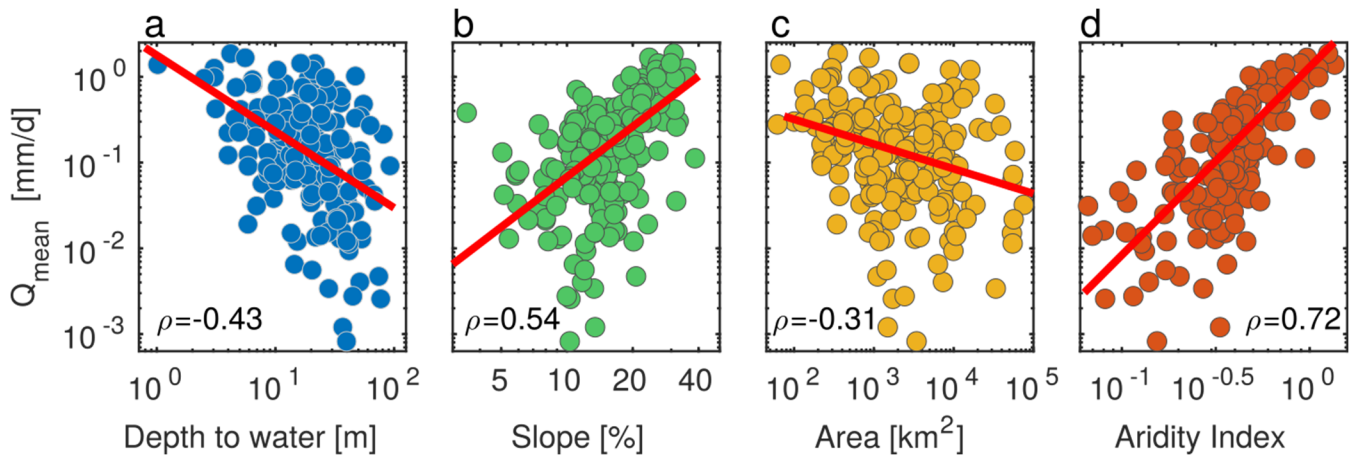

**Figure S3. A correlation analysis between mean specific discharge (discharge per basin area) and catchment attributes.** The relationships shown here are broadly similar to those shown for RRD peak height in figure 4 of the main text.
